# Supplementary material for: MirDIP 5.2: tissue context annotation and novel microRNA curation
Source: PubMed Central journal article supplement (PMC9825511; doi:10.1093/nar/gkac1070), 2022-12-01
Supplement: gkac1070_supplemental_file.pdf [file gkac1070_supplemental_file.pdf]

Supplementary Table 1. Novel miRNAs in each curated publication

| PubMed ID (Ref)        | Number of novel miRNAs |
|------------------------|------------------------|
| 28829439 <sup>1</sup>  | 13,088                 |
| 28911107 <sup>2</sup>  | 6,090                  |
| 25713380 <sup>3</sup>  | 3,707                  |
| 34140680 <sup>4</sup>  | 3,648                  |
| 24708865 <sup>5</sup>  | 2,469                  |
| 26635395 <sup>6</sup>  | 1,036                  |
| 28877962 <sup>7</sup>  | 990                    |
| 30842597 <sup>8</sup>  | 468                    |
| 31739401 <sup>9</sup>  | 340                    |
| 31828039 <sup>10</sup> | 292                    |
| 31368811 <sup>11</sup> | 154                    |
| 29587854 <sup>12</sup> | 103                    |
| 27716130 <sup>13</sup> | 99                     |
| 32738291 <sup>14</sup> | 13                     |

1. de Rie, D. *et al.* An integrated expression atlas of miRNAs and their promoters in human and mouse. *Nat Biotechnol* **35**, 872–878 (2017).
2. Fehlmann, T. *et al.* Web-based NGS data analysis using miRMaster: a large-scale meta-analysis of human miRNAs. *Nucleic Acids Res* **45**, 8731–8744 (2017).
3. Londin, E. *et al.* Analysis of 13 cell types reveals evidence for the expression of numerous novel primate- and tissue-specific microRNAs. *Proc Natl Acad Sci U S A* **112**, E1106-15 (2015).
4. Lorenzi, L. *et al.* The RNA Atlas expands the catalog of human non-coding RNAs. *Nat Biotechnol* **39**, 1453–1465 (2021).
5. Friedländer, M. R. *et al.* Evidence for the biogenesis of more than 1,000 novel human microRNAs. *Genome Biol* **15**, (2014).
6. Backes, C. *et al.* Prioritizing and selecting likely novel miRNAs from NGS data. *Nucleic Acids Res* **44**, (2016).
7. McCall, M. N. *et al.* Toward the human cellular microRNAome. *Genome Res* **27**, 1769–1781 (2017).
8. Barros-Filho, M. C. *et al.* Previously undescribed thyroid-specific miRNA sequences in papillary thyroid carcinoma. *J Hum Genet* **64**, 505–508 (2019).

9. Pewarchuk, M. E. *et al.* Upgrading the Repertoire of miRNAs in Gastric Adenocarcinoma to Provide a New Resource for Biomarker Discovery. *Int J Mol Sci* **20**, (2019).
10. Rock, L. D. *et al.* Expanding the Transcriptome of Head and Neck Squamous Cell Carcinoma Through Novel MicroRNA Discovery. *Front Oncol* **9**, (2019).
11. Martinez, V. D. *et al.* Discovery of Previously Undetected MicroRNAs in Mesothelioma and Their Use as Tissue-of-Origin Markers. *Am J Respir Cell Mol Biol* **61**, 266–268 (2019).
12. Minatel, B. C. *et al.* Large-scale discovery of previously undetected microRNAs specific to human liver. *Hum Genomics* **12**, (2018).
13. Wake, C. *et al.* Novel microRNA discovery using small RNA sequencing in post-mortem human brain. *BMC Genomics* **17**, (2016).
14. Ali, S. A. *et al.* Sequencing identifies a distinct signature of circulating microRNAs in early radiographic knee osteoarthritis. *Osteoarthritis Cartilage* **28**, 1471–1481 (2020).

Supplementary Table 2. Processed datasets for tissue annotation

| Dataset name | Link                                                                                                                                          | Molecule | Date of Download | Notes                 |
|--------------|-----------------------------------------------------------------------------------------------------------------------------------------------|----------|------------------|-----------------------|
| Panwar       | <a href="http://bioconductor.org/packages/release/bioc/html/miRmine.html">http://bioconductor.org/packages/release/bioc/html/miRmine.html</a> | microRNA | June 13th 2021   |                       |
| Naccarati    | <a href="https://www.ncbi.nlm.nih.gov/geo/query/acc.cgi?acc=GSE128359">GSE128359</a>                                                          | microRNA | July 28th 2021   |                       |
| Schulze      | <a href="https://www.ncbi.nlm.nih.gov/geo/query/acc.cgi?acc=GSE110719">GSE110719</a>                                                          | microRNA | July 28th 2021   |                       |
| Rahman       | <a href="https://www.ncbi.nlm.nih.gov/geo/query/acc.cgi?acc=GSE134949">GSE134949</a>                                                          | microRNA | July 28th 2021   |                       |
| McCall       | <a href="https://genome.cshlp.org/content/early/2017/09/06/gr.222067.117">https://genome.cshlp.org/content/early/2017/09/06/gr.222067.117</a> | microRNA | July 16th 2021   | Supplementary Table 5 |
| Lorenzi*     | <a href="https://www.ncbi.nlm.nih.gov/geo/query/acc.cgi?acc=GSE138734">GSE138734</a>                                                          | microRNA | June 10th 2022   |                       |
| Varghese*    | <a href="https://www.ncbi.nlm.nih.gov/geo/query/acc.cgi?acc=GSE176288">GSE176288</a>                                                          | microRNA | May 13th 2022    |                       |
| Vladimirova* | <a href="https://www.ncbi.nlm.nih.gov/geo/query/acc.cgi?acc=GSE138042">GSE138042</a>                                                          | microRNA | May 13th 2022    |                       |
| Ge*          | <a href="https://www.ncbi.nlm.nih.gov/geo/query/acc.cgi?acc=GSE121842">GSE121842</a>                                                          | microRNA | May 12th 2022    |                       |
| GeW*         | <a href="https://www.ncbi.nlm.nih.gov/geo/query/acc.cgi?acc=GSE149084">GSE149084</a>                                                          | microRNA | May 13th 2022    |                       |
| Mao*         | <a href="https://www.ncbi.nlm.nih.gov/geo/query/acc.cgi?acc=GSE138518">GSE138518</a>                                                          | microRNA | May 16th 2022    |                       |
| Hua*         | <a href="https://www.ncbi.nlm.nih.gov/geo/query/acc.cgi?acc=GSE135055">GSE135055</a>                                                          | microRNA | May 13th 2022    |                       |
| Francisco*   | <a href="https://www.ncbi.nlm.nih.gov/geo/query/acc.cgi?acc=GSE181922">GSE181922</a>                                                          | microRNA | May 15th 2022    |                       |
| TCGA         | <a href="https://gdac.broadinstitute.org/">https://gdac.broadinstitute.org/</a>                                                               | microRNA | Aug 30th 2022    | Used processed data   |

|              |                                                                                 |      |                           |                     |
|--------------|---------------------------------------------------------------------------------|------|---------------------------|---------------------|
| GTEX         | <a href="#">GTEX portal</a>                                                     | mRNA | June 10th 2021            |                     |
| IID          | <a href="#">IID website</a>                                                     | mRNA | May 24th 2021             |                     |
| Lorenzi      | <a href="#">GSE138734</a>                                                       | mRNA | Aug 30th 2022             | Used processed data |
| Varghese*    | <a href="#">GSE176271</a>                                                       | mRNA | May 24th 2022             |                     |
| Vladimirova* | <a href="#">GSE138042</a>                                                       | mRNA | May 4th 2022              |                     |
| Ge*          | <a href="#">GSE121842</a>                                                       | mRNA | May 10 <sup>th</sup> 2022 |                     |
| GeW*         | <a href="#">GSE149084</a>                                                       | mRNA | May 4th 2022              |                     |
| Mao*         | <a href="#">GSE138518</a>                                                       | mRNA | May 12th 2022             |                     |
| Lyu*         | <a href="#">GSE137308</a>                                                       | mRNA | May 13 <sup>th</sup> 2022 |                     |
| Bongiovanni* | <a href="#">GSE126448</a>                                                       | mRNA | May 16th 2022             |                     |
| Kim*         | <a href="#">GSE37765</a>                                                        | mRNA | May 25 <sup>th</sup> 2022 |                     |
| Schulze      | <a href="#">GSE110719</a>                                                       | mRNA | Aug 30th 2022             | Used processed data |
| TCGA         | <a href="https://gdac.broadinstitute.org/">https://gdac.broadinstitute.org/</a> | mRNA | Aug 30th 2022             | Used processed data |

\* Datasets run through Nextflow pipeline

## ID conversions

3' UTR sequences corresponding to GRCh38 release 103 were downloaded from Ensembl on May 17<sup>th</sup>, 2021 using the BioMart web interface (<http://useast.ensembl.org/biomart/martview/dbb0ff13a8229396fa5e492173880654>). Any 3'-UTR sequences shorter than 25nt in length were not considered, and the unique list of ensembl gene identifiers remaining was mapped to the latest HGNC via both Ensembl (downloaded May 26<sup>th</sup> 2021 from BioMart) and HGNC publicly available mapping files downloaded from [http://ftp.ebi.ac.uk/pub/databases/genenames/hgnc/tsv/hgnc\\_complete\\_set.txt](http://ftp.ebi.ac.uk/pub/databases/genenames/hgnc/tsv/hgnc_complete_set.txt) on May 19<sup>th</sup>, 2021. If there was no mapping, we discarded the 3'-UTR sequence in question from the dataset to avoid ambiguity.

The same process was applied to downloaded datasets, if they published Ensembl identifiers. In the case that a source dataset published RefSeq identifiers, the HGNC mapping from RefSeq to HGNC gene names, which is present in the aforementioned files downloaded from HGNC, was used to standardize identifiers, and any identifiers that could not be standardized to HGNC were discarded.

In the case of datasets publishing HGNC gene symbols directly or datasets published in mirDIP version 4.1, a unique list of all such identifiers was input into the HGNC symbol checker tool (<https://www.genenames.org/tools/multi-symbol-checker/>). Where the input symbol was noted by HGNC as a “Previous symbol” or “Alias symbol”, the input symbol was updated to the value in the “Approved symbol” column in mirDIP version 5.2, and all cases where the input symbol was noted as “Unmatched” or “Withdrawn symbol” resulted in records being discarded from the dataset.

### Details of run tools

| Tool         | Version | Default | Notes                                                                                                                                                                                                                                                                        |
|--------------|---------|---------|------------------------------------------------------------------------------------------------------------------------------------------------------------------------------------------------------------------------------------------------------------------------------|
| Bi-Targeting | 2010    | Yes     | Run with options:<br>max_err = 6<br>window_size = 30<br>GU = true<br>seed_start = 2<br>seed_end = 8<br>max_miRNA_bulge = 6<br>max_gene_bulge = 6<br>max_GU_in_seed = 1<br>max_GU_total = 4<br>energy_filter = false<br>energy_cutoff = -15<br>energy_normalized_cutoff = 0.4 |
| miRanda      | 3.3a    | Yes     |                                                                                                                                                                                                                                                                              |
| mirMAP       | 1.1     | Yes     |                                                                                                                                                                                                                                                                              |
| PITA         | 6.0     | Yes     | Filtered for energy <= -13.0 kcal/mol                                                                                                                                                                                                                                        |
| RNAhybrid    | 2.1.2   |         | Filtered for energy <= -22.0 kcal/mol, and p-value <= 0.1'                                                                                                                                                                                                                   |

### Nextflow details

Nextflow version 21.10.6.5660 runs on a private cloud with 12 bare metal x86\_64 architecture servers running the CentOS 7 operating system, kernel version 3.10.0-514.el7.x86\_64. Each server is identically configured, featuring the Intel(R) Xeon(R) CPU E5-2660 v3 @ 2.60GHz CPU, which equates to 40 threads with hyperthreading available on the 20 cores per CPU. Each server has 64GB of memory, some local storage for temporary files, and are connected to the GPFS storage area network by a 10Gbit network fabric. Jobs on a cluster are run using the SLURM job scheduling framework.

### **Nextflow tools versions**

#### *RNA-seq pipeline:*

- bbmap:38.93--he522d1c\_0
- bedtools:2.30.0--hc088bd4\_0
- bioconductor-dupradar:1.18.0--r40\_1
- bioconductor-summarizedexperiment:1.20.0--r40\_0
- bioconductor-tximeta:1.8.0--r40\_0
- hisat2:2.2.1--h1b792b2\_3
- multiqc:1.11--pyhdfd78af\_0
- perl:5.26.2
- picard:2.26.10--hdfd78af\_0
- preseq:3.1.2--h445547b\_2
- python:3.9--1
- qualimap:2.2.2d--1
- rseqc:3.0.1--py37h516909a\_1
- salmon:1.5.2--h84f40af\_0
- samtools:1.15.1--h1170115\_0
- stringtie:2.2.1--hecb563c\_2
- subread:2.0.1--hed695b0\_0
- ucsc-bedclip:377--h0b8a92a\_2
- ucsc-bedgraphtobigwig:377--h446ed27\_1
- Umi\_tools:1.1.2--py38h4a8c8d9\_0

#### **Code to run it**

```
nextflow run rnaseq --genome GRCh38 --input /samplesheet.csv --star_index  
false --gene_bed false --aligner star_rsem --outdir /outputdirectory --  
save_merged_fastq -profile ijcluster
```

*smRNA-seq:*

- fastqc:0.11.9--0
- biocontainers:v1.2.0\_cv1
- bioconvert:0.4.3--py\_0
- bowtie:1.3.0--py38hcf49a77\_2
- fastx\_toolkit:0.0.14--he1b5a44\_8
- mirdeep2:2.0.1.3--hdfd78af\_1
- mirtrace:1.0.1--hdfd78af\_1
- multiqc:1.11--pyhdfd78af\_0
- python:3.8.3
- r-data.table:1.12.2
- samtools:1.14--hb421002\_0
- seqcluster:1.2.8--pyh5e36f6f\_0
- seqkit:2.0.0--h9ee0642\_0
- Trim-galore:0.6.7--hdfd78af\_0

Code to run it:

```
nextflow run nf-core/smrnaseq -profile ijcluster --input /samplesheet.csv  
--outdir /outputdirectory --genome GRCh38 --protocol qiaseq --  
mirtrace_species hsa -r gittak_ac_config
```

Supplementary Table 3

| <b>MicroRNAs<br/>excluded due to<br/>ID conversion</b> | <b>Tools excluding such MicroRNAs</b>                                                                                                                                                       |
|--------------------------------------------------------|---------------------------------------------------------------------------------------------------------------------------------------------------------------------------------------------|
| hsa-miR-1254                                           | BCmicro,BiTargeting,CoMeTa,Cupid,DIANA,EIMMo3,MBStar,miRancestarPredictions,miRDB,MirMAP,mirnatip,MirSNPInTarget,miRTar2GO,mirzag,PACCMIT,reptar,RNA22,RNAhybrid,TargetRank,TargetSpy       |
| hsa-miR-1273a                                          | BCmicro,BiTargeting,CoMeTa,Cupid,DIANA,EIMMo3,MBStar,microna,miRancestarPredictions,miRDB,MirMAP,mirnatip,MirSNPInTarget,MirTar2,mirzag,PACCMIT,reptar,RNA22,RNAhybrid,TargetRank,TargetSpy |

|                 |                                                                                                                                                                                                        |
|-----------------|--------------------------------------------------------------------------------------------------------------------------------------------------------------------------------------------------------|
| hsa-miR-566     | BiTargeting,CoMeTa,Cupid,DIANA,EIMMo3,MBStar,microna,miRancestarPredictions,mirbase,miRDB,MirMAP,mirnatip,MirSNPInTarget,MirTar2,mirzag,MultiMiTar,PACCMIT,reptar,RNA22,RNAhybrid,TargetRank,TargetSpy |
| hsa-miR-3653-3p | BiTargeting,Cupid,DIANA,EIMMo3,MBStar,miRancestarPredictions,miRDB,MirMAP,mirnatip,MirSNPInTarget,MirTar2,PACCMIT,RNA22,RNAhybrid,TargetRank,TargetSpy                                                 |
| hsa-miR-3607-5p | BiTargeting,Cupid,DIANA,EIMMo3,MBStar,miRancestarPredictions,miRDB,MirMAP,mirnatip,MirSNPInTarget,MirTar2,mirzag,PACCMIT,RNA22,RNAhybrid,TargetRank,TargetSpy                                          |
| hsa-miR-3653    | BiTargeting,Cupid,DIANA,EIMMo3,MBStar,miRancestarPredictions,miRDB,MirMAP,mirnatip,MirSNPInTarget,MirTar2,mirzag,PACCMIT,RNA22,RNAhybrid,TargetRank,TargetSpy                                          |
| hsa-miR-1273e   | BiTargeting,Cupid,DIANA,EIMMo3,MBStar,miRancestarPredictions,miRDB,MirMAP,mirnatip,MirSNPInTarget,MirTar2,mirzag,PACCMIT,RNA22,RNAhybrid,TargetRank,TargetSpy                                          |
| hsa-miR-3607-3p | BiTargeting,Cupid,DIANA,EIMMo3,MBStar,miRancestarPredictions,miRDB,MirMAP,mirnatip,MirSNPInTarget,MirTar2,mirzag,PACCMIT,RNA22,RNAhybrid,TargetRank,TargetSpy                                          |
| hsa-miR-3687    | BiTargeting,Cupid,DIANA,EIMMo3,MBStar,miRancestarPredictions,miRDB,MirMAP,mirnatip,MirSNPInTarget,MirTar2,mirzag,PACCMIT,RNA22,RNAhybrid,TargetRank,TargetSpy                                          |
| hsa-miR-1273d   | BiTargeting,Cupid,DIANA,EIMMo3,MBStar,microna,miRancestarPredictions,miRDB,MirMAP,mirnatip,MirSNPInTarget,MirTar2,mirzag,PACCMIT,reptar,RNA22,RNAhybrid,TargetSpy                                      |
| hsa-miR-3656    | BiTargeting,DIANA,EIMMo3,MBStar,miRancestarPredictions,miRDB,MirMAP,mirnatip,MirSNPInTarget,MirTar2,mirzag,PACCMIT,RNA22,RNAhybrid,TargetRank,TargetSpy                                                |
| hsa-miR-4532    | BiTargeting,DIANA,MBStar,miRancestarPredictions,miRDB,MirMAP,mirnatip,MirSNPInTarget,MirTar2,mirzag,PACCMIT,RNA22,RNAhybrid,TargetRank,TargetSpy                                                       |
| hsa-miR-4792    | BiTargeting,DIANA,MBStar,miRancestarPredictions,miRDB,MirMAP,mirnatip,MirSNPInTarget,MirTar2,mirzag,PACCMIT,RNA22,RNAhybrid,TargetRank,TargetSpy                                                       |

|                      |                                                                                                                                                      |
|----------------------|------------------------------------------------------------------------------------------------------------------------------------------------------|
| hsa-miR-4419a        | BiTargeting,DIANA,MBStar,miRancestarPredictions,miRDB,MirMAP,mirnatip,MirS<br>NPInTarget,MirTar2,mirzag,PACCMIT,RNA22,RNAhybrid,TargetRank,TargetSpy |
| hsa-miR-4461         | BiTargeting,DIANA,MBStar,miRancestarPredictions,miRDB,MirMAP,mirnatip,MirS<br>NPInTarget,MirTar2,mirzag,PACCMIT,RNA22,RNAhybrid,TargetRank,TargetSpy |
| hsa-miR-4417         | BiTargeting,DIANA,MBStar,miRancestarPredictions,miRDB,MirMAP,mirnatip,MirS<br>NPInTarget,MirTar2,mirzag,PACCMIT,RNA22,RNAhybrid,TargetRank,TargetSpy |
| hsa-miR-4419b        | BiTargeting,DIANA,MBStar,miRancestarPredictions,miRDB,MirMAP,mirnatip,MirS<br>NPInTarget,MirTar2,mirzag,PACCMIT,RNA22,RNAhybrid,TargetRank,TargetSpy |
| hsa-miR-1273g-<br>5p | BiTargeting,DIANA,MBStar,miRancestarPredictions,miRDB,MirMAP,mirnatip,MirS<br>NPInTarget,MirTar2,mirzag,PACCMIT,RNA22,RNAhybrid,TargetRank,TargetSpy |
| hsa-miR-1273g-<br>3p | BiTargeting,DIANA,MBStar,miRancestarPredictions,miRDB,MirMAP,mirnatip,MirS<br>NPInTarget,MirTar2,mirzag,PACCMIT,RNA22,RNAhybrid,TargetRank,TargetSpy |
| hsa-miR-1273f        | BiTargeting,DIANA,MBStar,miRancestarPredictions,miRDB,MirMAP,mirnatip,MirS<br>NPInTarget,MirTar2,mirzag,PACCMIT,RNA22,RNAhybrid,TargetRank,TargetSpy |
| hsa-miR-5096         | BiTargeting,DIANA,MBStar,miRancestarPredictions,miRDB,MirMAP,mirnatip,MirS<br>NPInTarget,MirTar2,mirzag,PACCMIT,RNA22,RNAhybrid,TargetRank,TargetSpy |
| hsa-miR-4459         | BiTargeting,DIANA,MBStar,miRancestarPredictions,miRDB,MirMAP,mirnatip,MirS<br>NPInTarget,MirTar2,mirzag,PACCMIT,RNA22,RNAhybrid,TargetRank,TargetSpy |
| hsa-miR-5095         | BiTargeting,DIANA,MBStar,miRancestarPredictions,miRDB,MirMAP,mirnatip,MirS<br>NPInTarget,MirTar2,mirzag,PACCMIT,RNA22,RNAhybrid,TargetRank,TargetSpy |
| hsa-miR-6087         | BiTargeting,MBStar,miRancestarPredictions,miRDB,MirMAP,mirnatip,mirzag,RNA<br>22,RNAhybrid,TargetSpy                                                 |
| hsa-miR-6723-5p      | BiTargeting,MBStar,miRancestarPredictions,miRDB,MirMAP,mirnatip,mirzag,RNA<br>22,RNAhybrid,TargetSpy                                                 |
| hsa-miR-7641         | BiTargeting,miRancestarPredictions,miRDB,mirnatip,mirzag,RNA22,RNAhybrid,Ta<br>rgetSpy                                                               |
| hsa-miR-3669         | mirzag                                                                                                                                               |
| hsa-miR-3673         | mirzag                                                                                                                                               |
| hsa-miR-4520b-<br>5p | mirzag                                                                                                                                               |
| hsa-miR-455-3p.1     | targetscan                                                                                                                                           |



|                   |            |
|-------------------|------------|
| hsa-miR-455-3p.2  | targetscan |
| hsa-miR-483-3p.2  | targetscan |
| hsa-miR-496.1     | targetscan |
| hsa-miR-496.2     | targetscan |
| hsa-miR-504-5p.1  | targetscan |
| hsa-miR-505-3p.1  | targetscan |
| hsa-miR-505-3p.2  | targetscan |
| hsa-miR-483-3p.1  | targetscan |
| hsa-miR-101-3p.1  | targetscan |
| hsa-miR-411-5p.1  | targetscan |
| hsa-miR-101-3p.2  | targetscan |
| hsa-miR-124-3p.1  | targetscan |
| hsa-miR-124-3p.2  | targetscan |
| hsa-miR-126-3p.1  | targetscan |
| hsa-miR-126-3p.2  | targetscan |
| hsa-miR-133a-3p.1 | targetscan |
| hsa-miR-133a-3p.2 | targetscan |
| hsa-miR-140-3p.1  | targetscan |
| hsa-miR-140-3p.2  | targetscan |
| hsa-miR-142-3p.1  | targetscan |
| hsa-miR-142-3p.2  | targetscan |
| hsa-miR-183-5p.1  | targetscan |
| hsa-miR-183-5p.2  | targetscan |
| hsa-miR-203a-3p.1 | targetscan |
| hsa-miR-203a-3p.2 | targetscan |
| hsa-miR-302c-3p.1 | targetscan |

|                   |            |
|-------------------|------------|
| hsa-miR-302c-3p.2 | targetscan |
| hsa-miR-325-3p    | targetscan |
| hsa-miR-873-5p.1  | targetscan |
| hsa-miR-383-5p.1  | targetscan |
| hsa-miR-383-5p.2  | targetscan |

Supplementary Table 4

| Dataset name | Number of MicroRNAs that were excluded due to ID conversion |
|--------------|-------------------------------------------------------------|
| Panwar       | 266                                                         |
| Naccarati    | 1,765                                                       |
| Rahman       | 380                                                         |
| McCall       | 47                                                          |

Supplementary Table 5

| Database      | last update          |  |
|---------------|----------------------|--|
| miRDB         | 2019                 |  |
| TargetScan    | 2018                 |  |
| miRTar2GO     | 2016                 |  |
| MirAncesTar   | 2016                 |  |
| MiRNATIP      | 2016                 |  |
| Mirza-G       | 2015                 |  |
| Cupid         | 2015                 |  |
| RNA22         | 2015                 |  |
| mirbase       | 2014                 |  |
| MirTar        | 2014                 |  |
| MultiMiTar    | 2014                 |  |
| MBStar        | 2014                 |  |
| mirCoX        | 2013                 |  |
| PACCMIT       | 2013                 |  |
| BCmicrO       | <a href="#">2012</a> |  |
| CoMeTa        | 2012                 |  |
| DIANA         | 2012                 |  |
| mirRcode      | 2012                 |  |
| MirSNP        | 2012                 |  |
| <i>RepTar</i> | <a href="#">2011</a> |  |

|                     |                      |                           |
|---------------------|----------------------|---------------------------|
| <i>microrna.org</i> | <a href="#">2008</a> |                           |
| <i>EIMMo3</i>       | 2007                 |                           |
| <i>GenMir++</i>     | 2007                 |                           |
| <i>TargetRank</i>   | 2007                 |                           |
| <i>MAMI</i>         | 2006                 |                           |
| <i>PicTar</i>       | 2005                 |                           |
| <b>Algorithm</b>    | <b>Last update</b>   | <b>Note</b>               |
| RNAhybrid           | 2013                 |                           |
| MirMAP              | 2013                 |                           |
| miranda             | 2010                 |                           |
| BiTargeting         | 2010                 |                           |
| PITA                | 2008                 |                           |
| <i>miTAR</i>        | 2021                 | <i>failed to run</i>      |
| <i>TarPmiR</i>      | 2016                 | <i>failed to run</i>      |
| <i>chimiRic</i>     | 2016                 | <i>requires CLIP data</i> |
| <i>miRNALasso</i>   | 2015                 | <i>MATLAB based</i>       |
| <i>Avishkar</i>     | 2015                 | <i>requires CLIP data</i> |

\*Excluded
